# A spatially resolved network spike in model neuronal cultures reveals nucleation centers, circular traveling waves and drifting spiral waves

A. V. Paraskevov<sup>1,2</sup>, D. K. Zendrikov<sup>2,1</sup>

<sup>1</sup>National Research Centre "Kurchatov Institute", 123182 Moscow, Russia,

<sup>2</sup>Moscow Institute of Physics and Technology (State University), 141700 Dolgoprudny, Russia

We show that in model neuronal cultures, where the probability of interneuronal connection formation decreases exponentially with increasing distance between the neurons, there exists a small number of spatial nucleation centers of a network spike, from where the synchronous spiking activity starts propagating in the network typically in the form of circular traveling waves. The number of nucleation centers, as well as their spatial location, is unique and unchanged for a given realization of neuronal network but is different for different networks. In contrast, if the probability of interneuronal connection formation is independent of the distance between neurons, then the nucleation centers do not arise and the synchronization of spiking activity during a network spike occurs spatially uniform throughout the network. Therefore one can conclude that spatial proximity of connections between neurons is important for the formation of nucleation centers. It is also shown that fluctuations of the spatial density of neurons at their random homogeneous distribution typical for the experiments *in vitro* do not determine the location of the nucleation centers. The simulation results are qualitatively consistent with the experimental observations.

Keywords: cultured neuronal network, synaptic plasticity, spontaneous synchronization, network spike, spatial dynamics, nucleation centers, circular traveling wave, drifting spiral wave

## 1. Introduction

In neuronal cultures, i.e., planar neuronal networks grown *in vitro* from initially dissociated neurons of cerebral cortex or hippocampus, one can often detect spontaneous short-term (fractions of a second) repetitive synchronization of neuronal spiking activity called a network spike or a population burst [1, 2, 3, 4, 5]. This phenomenon is thought to be related to epilepsy [6, 7] therefore both the origin and the properties of network spikes are the subject of intensive studies. In a recent paper [5] (see also [8]) it has been shown experimentally that a typical network spike has a few steady spatial sources - nucleation centers of traveling waves of synchronous spiking activity. The causes of their occurrence have not yet identified. As described in [5], the number and location of the nucleation centers for different neuronal cultures are different, but for the same neuronal culture these remain practically unchanged during the observation period.

In this paper, by means of simulations, we investigated the spatial dynamics of network spikes in large planar neuronal networks (50 thousand neurons, several millions of interneuronal connections) that are comparable to real neuronal cultures. It was suggested that the probability  $p_{con}(r)$  of an unidirectional connection between two neurons decreases exponentially as a function of the distance  $r$  between them [9]. In fact, we have

generalized the results of the work [10], where the network spikes occurred in a model neuronal network composed of Leaky Integrate-and-Fire (LIF) neurons with binomial distribution of interneuron connections and relaxational synaptic plasticity, for the case of spatially dependent network topology, taking into account the respective propagation delays of signals between neurons.

We have found that (i) for the network of excitatory neurons, uniformly distributed over the square area, there is indeed a small number of nucleation centers of a network spike from which the synchronous spiking activity propagates farther typically in the form of circular traveling waves. The number of nucleation centers, as well as their spatial location, is unique and invariable for a given implementation of the neuronal network, but is different for different networks. Note that the nucleation centers were not nested in fluctuations of spatial density of neurons and the change in the function  $p_{con}(r)$ , under certain conditions on the average values of network parameters, did not lead to the disappearance of nucleation centers. (ii) If the probability of formation of interneuronal connection was not dependent on the neurons' location relative to each other, then the nucleation centers did not arise - the synchronization of spiking activity occurred spatially uniform throughout the network. (iii) If the average number of outgoing synaptic

connections per neuron in the network was sufficiently large, then a drifting spiral wave could arise occasionally during some network spikes.

The results obtained, in particular, the existence of nucleation centers and the statistical regularities of their occurrence, seem consistent with the spatial dynamics of network spikes described in [5]. It is worth noting that the dynamic transitions between the phases of asynchronous and synchronous spiking activity of the network could be related to phase transitions of either the first (case (i)) or the second (case (ii)) kind, depending on the degree of locality of the majority of interneuronal connections.

## 2. Materials and methods

**Neuronal Network Model.** A mathematical model of the neuronal network comprised of three main components: (I) the model of a neuron, (II) synapse model describing the interaction between neurons, and (III) algorithm for generating the network topology. By default, the network consisted of 80% excitatory and 20% inhibitory neurons. The values of parameters for the neuron and synapse models, including the parameters of normal distributions (standard deviations of which by default were taken equal to 1/2 of the average values), do not differ essentially from those used in article [10] (see [11]).

As a neuron model, the standard LIF-neuron has been used. Subthreshold dynamics of the transmembrane potential  $V$  of such a neuron is described by the equation

$$\tau_m dV/dt = V_{rest} - V(t) + (I_{syn}(t) + I_{bg})R_m, \quad (1)$$

where  $V_{rest}$  is the neuron's resting potential,  $\tau_m$  is the characteristic time for relaxation of  $V$  to  $V_{rest}$ ,  $R_m$  is the electrical resistance of the neuron's membrane,  $I_{syn}(t)$  is the total incoming synaptic current, which, as a function of time  $t$ , depends on the choice of the dynamic model of a synapse and the number of incoming synapses,  $I_{bg}$  is a constant "background" current, the magnitude of which varies from neuron to neuron by a normal distribution. Note that the background currents are required in order to initiate and sustain a spontaneous asynchronous spiking activity of the network.

When the transmembrane potential reaches a threshold value  $V_{th} = V(t_{sp})$ , it is supposed that the neuron emits a spike, then  $V$  abruptly drops to a specified value  $V_{reset}$ ,  $V_{rest} < V_{reset} < V_{th}$ , and retains this value during the period of refractoriness  $\tau_{ref}$ , then the dynamics of the potential is again described by the

equation (1). The result of the LIF-neuron dynamics is a sequence of spike generation moments  $\{t_{sp}^{(1)}, t_{sp}^{(2)}, \dots\}$ .

If a neuron has the value of  $I_{bg}$  that exceeds a critical value  $I_c = (V_{th} - V_{rest})/R_m$ , then this neuron is a pacemaker, i.e., it is able to emit spikes periodically, with the period  $\Delta t_{sp} = \tau_{ref} + \tau_m \ln[(I_{bg} - I_r)/(I_{bg} - I_c)]$ , where  $I_r = (V_{reset} - V_{rest})/R_m$ , in the absence of incoming signals from other neurons.

II. A single contribution to the incoming synaptic current in the TUM model [10] is determined by the formula

$$I_{syn}(t) = A \cdot y(t), \quad (2)$$

where  $A$  is the maximum amplitude of synaptic current, the sign and magnitude of which depend on the type of pre- and postsynaptic neurons (i.e., whether the neuron is excitatory or inhibitory), and  $y(t)$  is a dimensionless parameter,  $0 \leq y \leq 1$ , the dynamics of which is determined by the following system of equations:

$$\begin{cases} dx/dt = z/\tau_{rec} - u \cdot x \cdot \delta(t - t_{sp}), \\ dy/dt = -y/\tau_I + u \cdot x \cdot \delta(t - t_{sp}), \\ dz/dt = y/\tau_I - z/\tau_{rec}, \end{cases} \quad (3)$$

where  $x$ ,  $y$ , and  $z$  are the fractions of synaptic resources in the recovered, active and inactive state, respectively,  $x + y + z = 1$ ,  $\tau_{rec}$ ,  $\tau_I$  are the characteristic relaxation times,  $t_{sp}$  is the moment of spike generation at the presynaptic neuron (the signal propagation delay between neurons is not taken into account in the original model [10]),  $\delta(\dots)$  is the Dirac delta function,  $u$  is the fraction of recovered synaptic resource used to transmit the signal across the synapse,  $0 \leq u \leq 1$ . For the outgoing synapses of inhibitory neurons, the dynamics of  $u$  is described by the equation

$$du/dt = -u/\tau_{facil} + U \cdot (1 - u) \cdot \delta(t - t_{sp}), \quad (4)$$

where  $\tau_{facil}$  is the characteristic relaxation time, and  $0 < U \leq 1$  is a constant parameter. For the outgoing synapses of excitatory neurons,  $u$  remains constant and equals to  $U$ . In the numerical simulations the constants  $A$  and  $U$ , as well as all the characteristic relaxation times (except for  $\tau_I$ ) in the synaptic current model, were normally distributed, i.e., each synapse had its own unique values of these parameters.

III. We used the binomial and spatially-dependent distributions of interneuron connections. In the case of "binomial" network topology, we set a constant probability  $p_{con}$  of the formation of unilateral synaptic connection between two neurons, independent of their spatial coordinates. Then in the network of  $N$  neurons the number  $m$  of outgoing connections of a neuron is described by the binomial distribution  $P(m) =$

$C_{N-1}^m p_{con}^m (1 - p_{con})^{N-1-m}$ , where  $0 \leq m \leq N-1$ , with mean value  $\bar{m} = p_{con}(N-1)$ .

In the case of spatially-dependent network topology, point neurons were uniformly distributed over a square area  $L \times L$  of unit size ( $L = 1$ ). The probability of formation of unilateral connection between each pair of neurons depended on the distance  $r$  between them according to the formula [9]

$$p_{con}(r) = B e^{-r/\lambda}, \quad (5)$$

where  $\lambda$  is the characteristic connection length, expressed in units of  $L$ . The constants  $B$  and  $\lambda$ , for simplicity, were chosen independent of the types of pre- and postsynaptic neurons, in particular, it was taken  $B = 1$ ,  $\lambda = \text{const}$  for all combinations of types of neurons.

Note two essential circumstances: first, since the square area is a convex set of points, and the interneuron connections were modeled by segments of straight lines, we did not take into account the edge effects when creating the network. Secondly, despite the fact that  $p_{con}(r)$  reaches its maximum at  $r = 0$ , the distribution of the lengths of interneuronal connections is zero at  $r = 0$  and reaches its maximum at the point  $r \approx \lambda$ , provided that  $\lambda \lesssim 0.1$ . One can show this straightforwardly by finding the probability density  $P(r)$  to detect two neurons at a distance  $r$  from each other,

$$P(r) = \begin{cases} 2r \cdot (\pi - 4r + r^2), & r \leq 1, \\ 4r \cdot (2 \arcsin(1/r) + 2\sqrt{r^2 - 1} - \dots) & \\ -\pi/2 - r^2/2 - 1), & 1 < r \leq \sqrt{2}, \end{cases} \quad (6)$$

such that  $\int_0^{\sqrt{2}} P(r) dr = 1$  [11, 12, 13, 14]. The distribu-

tion of interneuronal connection lengths is given by the product  $p_{con}(r)P(r)$  (Fig. 1, upper graph), cp. [15]. In turn, the average number of interneuron connections in the network of  $N$  neurons is

$$N_{con}(\lambda) = N(N-1) \int_0^{\sqrt{2}} p_{con}(r)P(r)dr, \quad (7)$$

so that the corresponding probability for the binomial distribution can be found as  $p_{con} = N_{con}(\lambda)/(N(N-1))$  (Fig. 1, lower graph). The approximate analytical expression for the function  $N_{con}(\lambda)$  is given in [11].

The delays resulting from the propagation of spikes along the axons were calculated by the formula [16]

$$\tau_{del} = \tau_{del,min} + r/v_{sp}, \quad (8)$$

where  $\tau_{del}$  is the total propagation delay of a spike along the axon of length  $r$ ,  $\tau_{del,min}$  is the minimal axonal delay

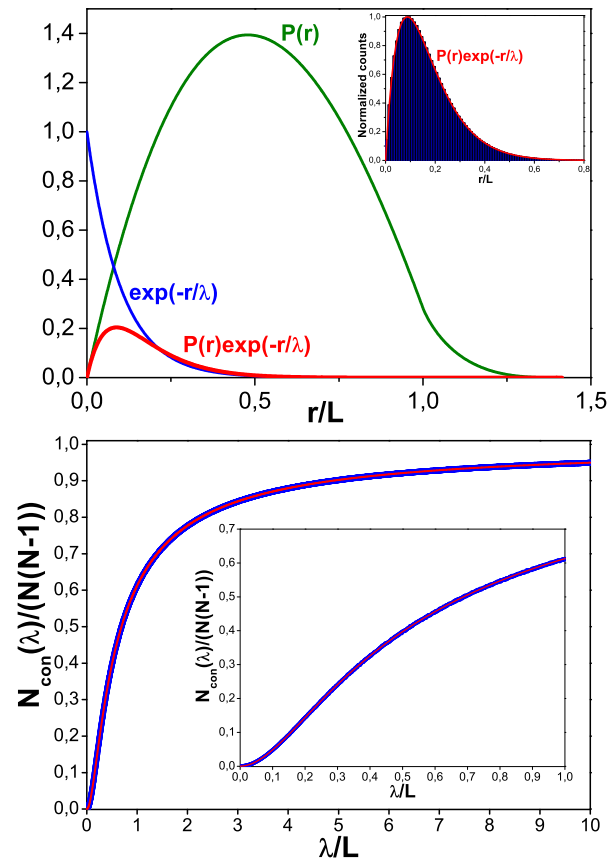

Figure 1. Upper graph: The probability density  $P(r)$  to find two neurons, whose spatial coordinates are at random uniformly distributed in the square  $L \times L$ , at a distance  $r$  from each other. Inset: normalized distribution of the interneuronal connection lengths for the network of 10 thousand neurons at  $\lambda = 0.1$  (see (5)) and the corresponding product  $p_{con}(r)P(r)$ . Lower graph: Functional dependence  $N_{con}(\lambda)$  obtained (i) by direct simulation of the networks of  $N = 10^4$  neurons (thick blue curve) and (ii) with the use of the approximate analytical expression of Eq. (7) (thin red curve).

the same for all synapses, and  $v_{sp}$  is the constant speed of spike propagation along the axon [11]. Note that the distribution of axonal delays (8) is also determined by the product  $p_{con}(r)P(r)$ .

### 3. Results

Article [10] lists the parameter values for the TUM model at which the regime of repetitive network spikes occurs in simulations (Fig. 2). This regime is characterized by a broad distribution of intervals between subsequent network spikes (in [17, 18] it is shown that the distribution of increments of these intervals may be approximated by the Levy distribution). It is this regime ("TUM regime") we have obtained and examined for the

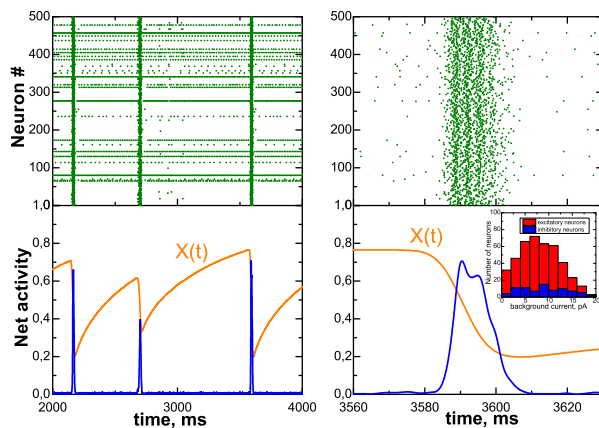

Figure 2. Spiking activity of the "binomial" neuronal network of 500 LIF-neurons (80% excitatory, 20% inhibitory; 6.4% pacemaker neurons) with normal distribution of the background currents (see the inset at right). LEFT: Raster plot (top) and spiking activity averaged over 2 ms and normalized to the total number of neurons (bottom). Network spikes are the vertical stripes in the raster and the peaks on the activity plot.  $X(t)$  is the network-averaged fraction of synaptic resources in the recovered state. RIGHT: The same quantities for a single network spike.

case of spatially-dependent network topology. It is important to note that this occurs only in relatively narrow region of values of the average number  $\bar{m} = p_{con}(N - 1)$  of outgoing connections per neuron. In particular, keeping unchanged other parameters of the simulations, for the networks of excitatory neurons the TUM-regime occurred in the range  $30 \lesssim \bar{m} \lesssim 90$  (see Fig. 3). If the network comprises 20% inhibitory neurons, this range is expanding,  $30 \lesssim \bar{m} \lesssim 150$ . For planar networks with a large number of neurons (40-50 thousand) uniformly distributed over a square area, the parameter  $\lambda$ , which determines the probability (5) of interneuronal connection formation, was typically set so that the average number of outgoing connections per neuron was inside this range, near its lower boundary for the sake of conserving computing resources.

In the TUM-regime, a network spike in the network of excitatory neurons uniformly distributed in the square area starts in one of a few (usually 3-4) spatial centers - primary nucleation centers, from which the synchronous spiking activity propagates through the network in the form of a circular traveling wave, accompanied by the activation of more numerous secondary nucleation centers (Fig. 4). A spatial profile of the network spike emerging in the nucleation center is shown in Fig. 5.

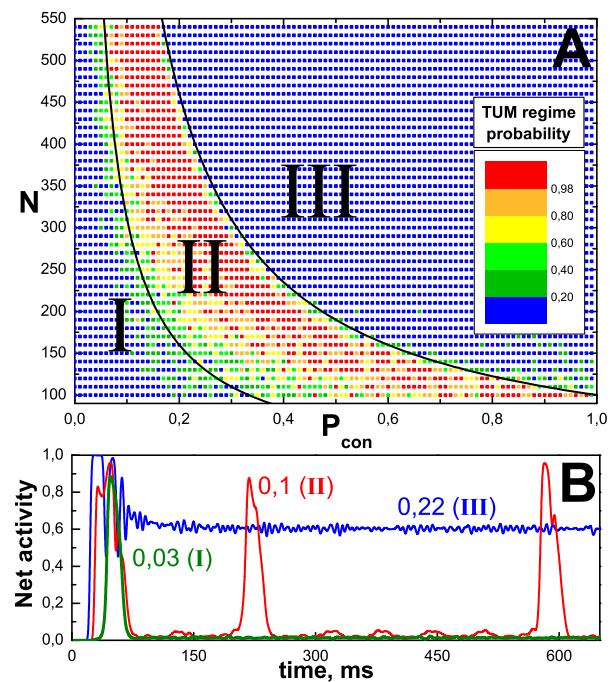

Figure 3. **A:** The phase diagram of the occurrence probability for the regime of aperiodically repetitive network spikes (TUM-regime) in the "binomial" networks of excitatory neurons.  $N$  is the number of neurons in the network,  $P_{con}$  is the probability of interneuronal connection formation. Each pixel of the diagram displays the relative number of realizations of a neuronal network with given values of  $N$  and  $P_{con}$  (in total, there were 5 such trials) for which the TUM-regime was observed. **B:** Examples of averaged (over 3 ms) spiking activity of the network of  $N = 500$  excitatory neurons at  $P_{con} = 0.03, 0.1, 0.22$ .

The primary nucleation centers are determined at the initial stage of a network spike by their invariable spatial arrangement (Fig. 5, right graph). The evaluation of their number, obviously, depends on the simulation time since the network spikes occur randomly in one of them. According to our observations (in total, 12 simulations of the same type and 14 various modifications were performed), the number of primary nucleation centers ceases to increase after 10-15 sequentially passed network spikes. We therefore conclude that it remains the same for a given realization of the neuronal network, being different for different networks. Note that the average frequency of generating network spikes for the networks of 40 thousand excitatory neurons is in the order of magnitude of 1 Hz, provided that the simulation time-step is 0.1 ms and the simulation time is 10 s. Inhibitory neurons, in their turn, generally (i) decrease the average frequency of network spike occurrence, (ii) increase the variability of both the amplitude

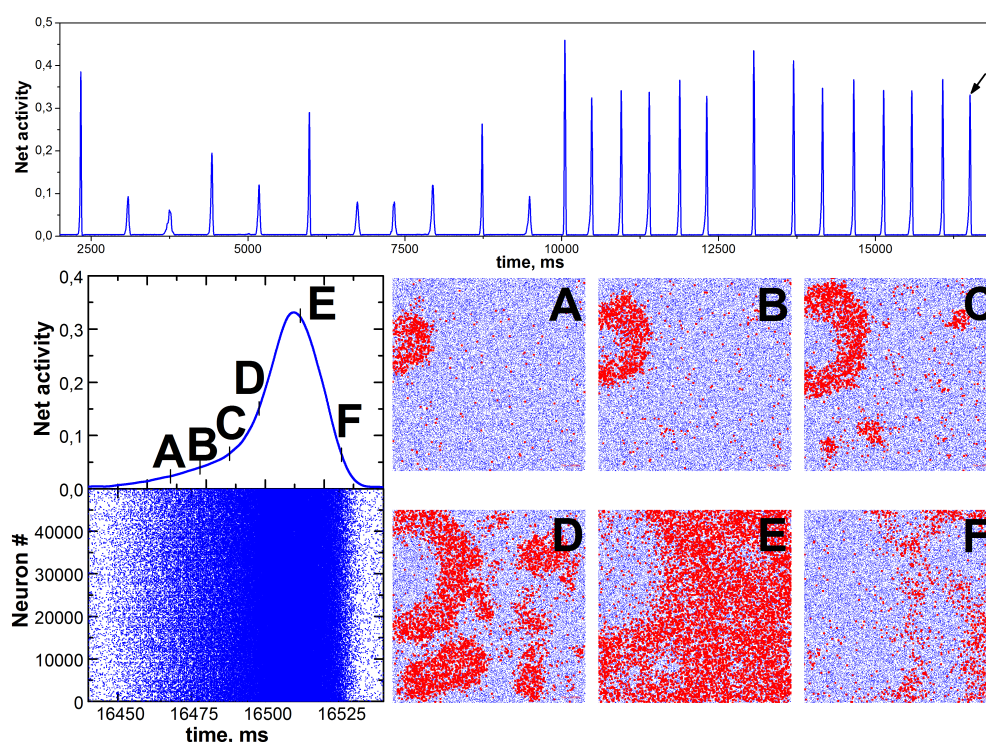

Figure 4. Upper graph: Averaged (over 2 ms) spiking activity of the network of 50 thousand neurons at  $\lambda = 0.01$ . After the first 10 seconds of the simulation the inhibitory neurons (20% of the total) are blocked, i.e. do not participate in spiking dynamics of the network, in order to obtain a clear picture of the propagation of synchronous spiking activity from the smallest number of nucleation centers. Lower graph: LEFT: Network activity (top) and raster (bottom) during the network spike marked by the arrow in the upper graph. RIGHT: Snapshots of the instantaneous spatial activity of neurons for the corresponding moments of the network spike. Blue dots depict neurons and red dots highlight spiking neurons. Each frame corresponds to the area  $L \times L$ . On the frame C it is seen that in addition to the primary nucleation center (frame A) three secondary centers become active. The simulation parameters are described in details in [7].

and duration of a network spike, and (iii) increase the number of nucleation centers.

Interestingly, if the average number of outgoing synaptic connections per neuron is sufficiently large (i.e., parameter  $\lambda$  in Eq. (5) is relatively large), then a drifting spiral wave can arise during some network spikes (Fig. 6), given that most of the network spikes still start with circular traveling waves propagating from the stationary nucleation centers. (In total, three such spirals occurred in two of five identical simulations at  $\lambda = 0.04$  with relative frequencies 1/12 and 2/10, respectively.)

#### 4. Discussion

A theory for the origin of the nucleation centers of network spikes, enabling prediction of the number and location of primary nucleation centers without carrying out the dynamic simulations, is currently absent. We have excluded the influence of fluctuations of the spatial distribution density of neurons by placing the neurons strictly periodically in the nodes of a square lattice

- the nucleation centers still occurred (Fig. 7, upper panel). One-to-one correspondence was not observed between the locations of local maxima of spatial density of pacemaker neurons and primary nucleation centers. Nucleation centers occurred even at identical values of synaptic parameters (see (2), (3)) for all synapses of the network.

Modifications of the functional dependence of the probability of interneuronal connection formation on the distance between neurons (e.g.,  $p_{con}(r) = \theta(\lambda - r)$ , where  $\theta(\dots)$  is unit step function), provided that (i) the average number of outgoing connections per neuron remains the same in the order of magnitude and (ii) neurons located far (compared with the characteristic distance  $\lambda$ ,  $L/\sqrt{N} < \lambda \ll L$ ) from each other practically do not form connections, also do not lead to the disappearance of nucleation centers. On the other hand, if the probability of interneuronal connection formation was independent of the distance between neurons (i.e.,  $p_{con}(r) = const$ , given that the average number of

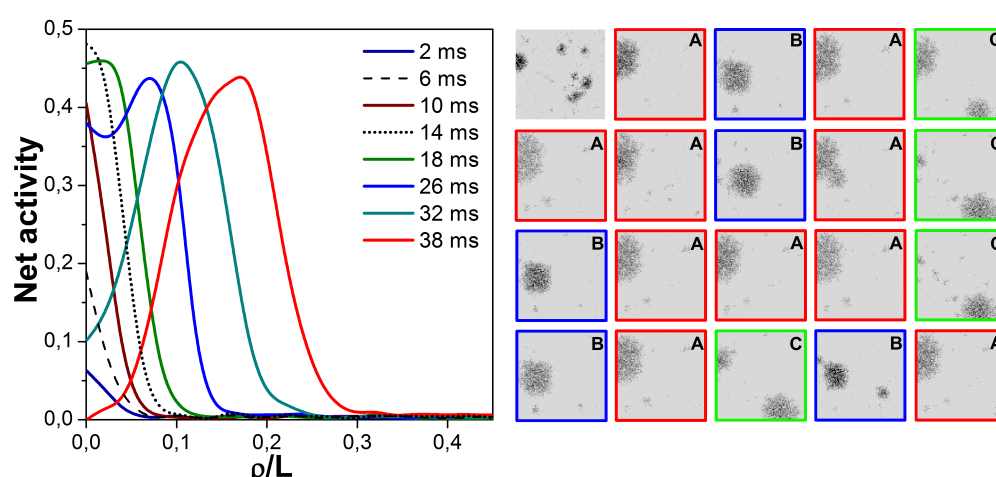

Figure 5. Left graph: The dynamics of spiking activity front for the initial stage of the network spike shown in Fig. 4 (see frames A - C) with the relative times indication. The vertical axis denotes the spatially-averaged spiking activity of the network, the horizontal one shows the distance  $\rho$  from the nucleation center. Right graph: Spatial locations of the nucleation centers of 20 network spikes for the same network as that in Fig. 4. Three nucleation centers (A, B, C) are clearly distinguishable. Black dots depict the spatial spiking activity of neurons during the first 40 ms after the network spike onset that was determined by the excess of a threshold value for the network spiking activity.

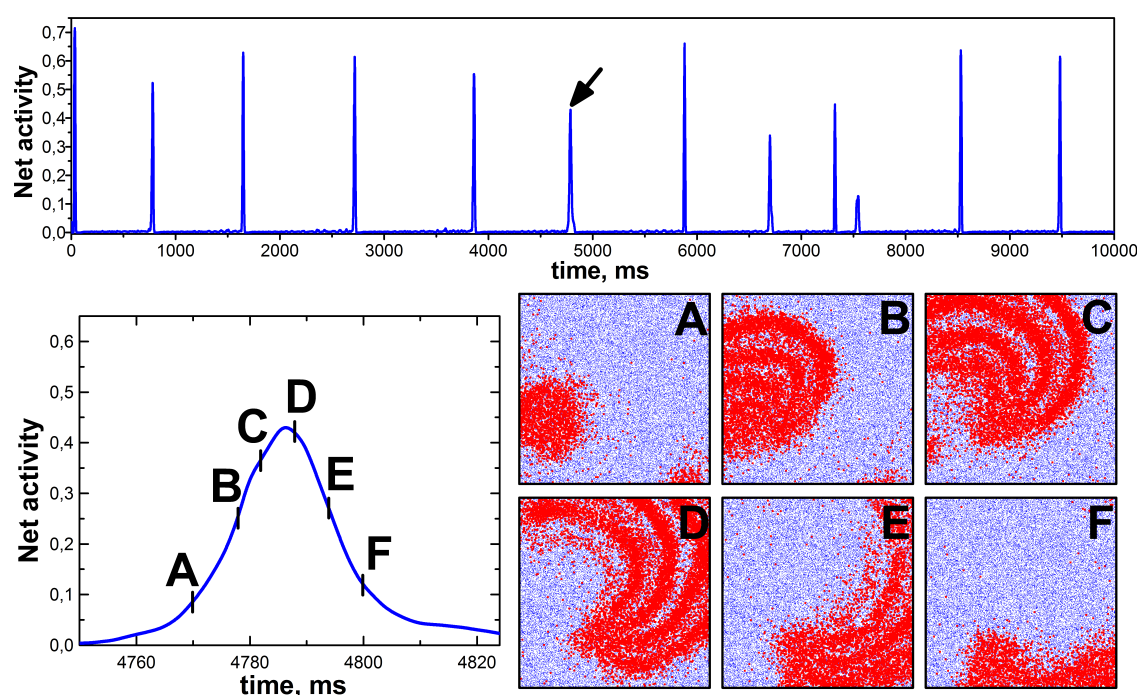

Figure 6. Drifting spiral wave during the network spike (marked by the arrow) for the network of 50 thousand neurons at  $\lambda = 0.04$  that gives approx. 23 million interneuron connections in the network with approx. 460 outgoing connections per neuron. Other simulation parameters were taken the same as for the network in Fig. 4. Inhibitory neurons (20% of the total) are not blocked during the whole time of the simulation. Blocking inhibitory neurons at  $\lambda = 0.04$  results in disappearance of the TUM-regime (see region III of the phase diagram in Fig. 3 A).

outgoing connections per neuron remains unchanged), the nucleation centers did not arise - synchronization of spiking activity occurred spatially uniform throughout the network (lower panel in Fig. 7, a total of 5 such

simulations were performed). Here, it may be significant that the variance of the total number of interneuronal connections of the network with  $p_{con}(r) = e^{-r/\lambda}$ , corresponding to the Bernoulli trials with variable probabili-



ties of success, reaches its maximum at  $p_{con}(r) = const$ , i.e. in the limit of standard binomial distribution [19]. Nevertheless, the results of simulations strongly suggest that the spatial proximity of the majority of network interneuronal connections is important for the formation of nucleation centers. Moreover, the evaluation of network-averaged values of the shortest path length  $\langle SPL \rangle$  and clustering coefficient  $\langle C \rangle$  [20] indicates that the neuronal networks exhibiting nucleation centers during network spikes belong to small-world networks. In particular,  $\langle SPL \rangle \approx 4.3$  and  $\langle C \rangle \approx 0.1$  for the network in Fig. 4,  $\langle SPL \rangle \approx 3.8$  and  $\langle C \rangle \approx 0.1$  for the network in Fig. 7 (upper panel), and  $\langle SPL \rangle \approx 3.4$  and  $\langle C \rangle \approx 10^{-3}$  for truly random (binomial) network in Fig. 7 (lower panel).

In general, our findings on nucleation centers, circular traveling waves and drifting spiral waves of spiking activity are in qualitative agreement with the already known. In particular, the nucleation centers and circular traveling waves during a network spike were directly observed experimentally in neuronal cultures [5], and the spiral waves were observed in disinhibited neocortical slices [21]. The similar effects (e.g., circular and spiral waves), regardless to the occurrence of network spikes, were also obtained in previous computational studies [22, 23, 24, 25] using different models of the neuronal network.

## 5. Conclusion

A relatively simple model of a planar neuronal culture is described that demonstrates in simulations the regime of repetitive network spikes emerging in a small number of spatial nucleation centers, the location of which is unique for a given network implementation. In fact, the number and location of primary nucleation centers are dynamic "marks of distinction" of neuronal cultures from each other.

More specifically, we have shown that (i) in spatially uniform networks of excitatory neurons, a typical network spike has complex spatial dynamics with a few nucleation centers, (ii) the spatial nucleation centers of a network spike appear if the majority of connections between neurons are the local ones, and (iii) the nucleation centers are not nested in fluctuations of spatial density of neurons.

It is worth noting that the spatial dynamics of a network spike in real neuronal cultures can be directly visualized with high spatial and temporal resolution using multi-transistor arrays [26] or advanced standard microelectrode arrays [27]. Therefore the results of sim-

ulations similar to those conducted in this study allow a direct comparison with experimental observations.

**Authors' contributions.** A.P. designed the study, carried out mathematical calculations, performed several simulations and drafted the manuscript. D.Z. participated in the design of the study, developed simulation software and performed most of the simulations. All authors contributed to data analysis and graph plotting. All authors gave final approval for publication.

**Competing interests.** The authors declare no competing financial interests.

## References

1. R. Segev et al., Observations and modeling of synchronized bursting in two-dimensional neural networks, *Phys. Rev. E* 64 (2001) 011920. (doi:10.1103/PhysRevE.64.011920)
2. D. Eytan, S. Marom, Dynamics and effective topology underlying synchronization in networks of cortical neurons, *J. Neurosci.* 26 (2006) 8465–8476. (doi:10.1523/JNEUROSCI.1627-06.2006)
3. R. Madhavan, Z.C. Chao, S.M. Potter, Plasticity of recurring spatiotemporal activity patterns in cortical networks, *Phys. Biol.* 4 (2007) 181–193. (doi:10.1088/1478-3975/4/3/005)
4. T.A. Gritsun, J. Feber, W.L.C. Rutten, Growth dynamics explain the development of spatiotemporal burst activity of young cultured neuronal networks in detail, *PLoS ONE* 7 (2012) e43352. (doi:10.1371/journal.pone.0043352)
5. J.G. Orlandi et al., Noise focusing and the emergence of coherent activity in neuronal cultures, *Nature Phys.* 9 (2013) 582–590. (doi:10.1038/nphys2686)
6. D.A. McCormick, D. Contreras, On the cellular and network bases of epileptic seizures, *Annu. Rev. Physiol.* 63 (2001) 815–846. (doi:10.1146/annurev.physiol.63.1.815)
7. J. Milton, P. Jung (eds.), *Epilepsy as a Dynamic Disease*, 1st Edition, Springer-Verlag Berlin Heidelberg, 2003.
8. E. Maeda, H.P. Robinson, A. Kawana, The mechanisms of generation and propagation of synchronized bursting in developing networks of cortical neurons, *J. Neurosci.* 15 (1995) 6834–6845. (<http://www.jneurosci.org/content/15/10/6834.full.pdf>)
9. R. Miles, R.D. Traub, R.K. Wong, Spread of synchronous firing in longitudinal slices from the CA3 region of the hippocampus, *J. Neurophysiol.* 60 (1988) 1481–1496. (<https://jn.physiology.org/content/60/4/1481.full.pdf>)

10. M. Tsodyks, A. Uziel, H. Markram, Synchrony generation in recurrent networks with frequency-dependent synapses, *J. Neurosci.* 20 (2000) RC50. (<http://www.jneurosci.org/content/20/1/RC50.full.pdf>)
11. See Supplementary Material.
12. B. Gaboune, G. Laporte, F. Soumis, Expected Distances between Two Uniformly Distributed Random Points in Rectangles and Rectangular Parallelepipeds, *J. Oper. Res. Soc.* 44 (1993) 513–519. (doi:10.2307/2583917)
13. A.M. Mathai, P. Moschopoulos, G. Pederzoli, Random points associated with rectangles, *Rend. Circ. Mat. Palermo* 48 (1999) 163–190. (doi:10.1007/BF02844387)
14. J. Philip, The probability distribution of the distance between two random points in a box, preprint TRITA MAT 07 MA 10, <https://people.kth.se/~johanph/habc.pdf>, 2007 (accessed: 27 May 2016).
15. R. Segev, E. Ben-Jacob, Generic modeling of chemotactic based self-wiring of neural networks, *Neural Networks* 13 (2000) 185–199. (doi:10.1016/S0893-6080(99)00084-2)
16. P. Yger et al., Topologically invariant macroscopic statistics in balanced networks of conductance-based integrate-and-fire neurons, *J. Comput. Neurosci.* 31 (2011) 229–245. (doi:10.1007/s10827-010-0310-z)
17. R. Segev et al., Long term behavior of lithographically prepared in vitro neuronal networks, *Phys. Rev. Lett.* 88 (2002) 118102. (doi:10.1103/PhysRevLett.88.118102)
18. E. Persi et al., Modeling of synchronized bursting events: the importance of inhomogeneity, *Neural Comput.* 16 (2004) 2577–2595. (doi:10.1162/0899766042321823)
19. W. Feller, *An Introduction to Probability Theory and Its Applications*, Volume 1, 3rd Edition, Wiley, 1968.
20. D.J. Watts, S.H. Strogatz, Collective dynamics of small-world networks, *Nature* 393 (1998) 440–442. (doi:10.1038/30918)
21. X. Huang et al., Spiral waves in disinhibited mammalian neocortex, *J. Neurosci.* 24 (2004) 9897–9902. (doi:10.1523/JNEUROSCI.2705-04.2004)
22. J.G. Milton, P.H. Chu, J.D. Cowan, Spiral waves in integrate-and-fire neural networks, *Advances in Neural Information Processing Systems* 5 (NIPS 1992), pp. 1001–1006. <https://papers.nips.cc/paper/689-spiral-waves-in-integrate-and-fire-neural-networks.pdf>
23. P.H. Chu, J.G. Milton, J.D. Cowan, Connectivity and the dynamics of integrate-and-fire neural networks, *Int. J. Bifurcat. Chaos* 4 (1994) 237–243. (doi:10.1142/S0218127494000198)
24. C. Fohlmeister et al., Spontaneous excitations in the visual cortex: stripes, spirals, rings, and collective bursts, *Neural Comput.* 7 (1995) 905–914. (doi:10.1162/neco.1995.7.5.905)
25. W.M. Kistler, R. Seitz, J.L. van Hemmen, Modeling collective excitations in cortical tissue, *Physica D* 114 (1998) 273–295. (doi:10.1016/S0167-2789(97)00195-4)
26. A. Lambacher et al., Identifying firing mammalian neurons in networks with high-resolution multi-transistor array (MTA), *Appl. Phys. A* 102 (2011) 1–11. (doi:10.1007/s00339-010-6046-9)
27. M. Gandolfo et al., Tracking burst patterns in hippocampal cultures with high-density CMOS-MEAs, *J. Neural Eng.* 7 (2010) 056001. (doi:10.1088/1741-2560/7/5/056001)



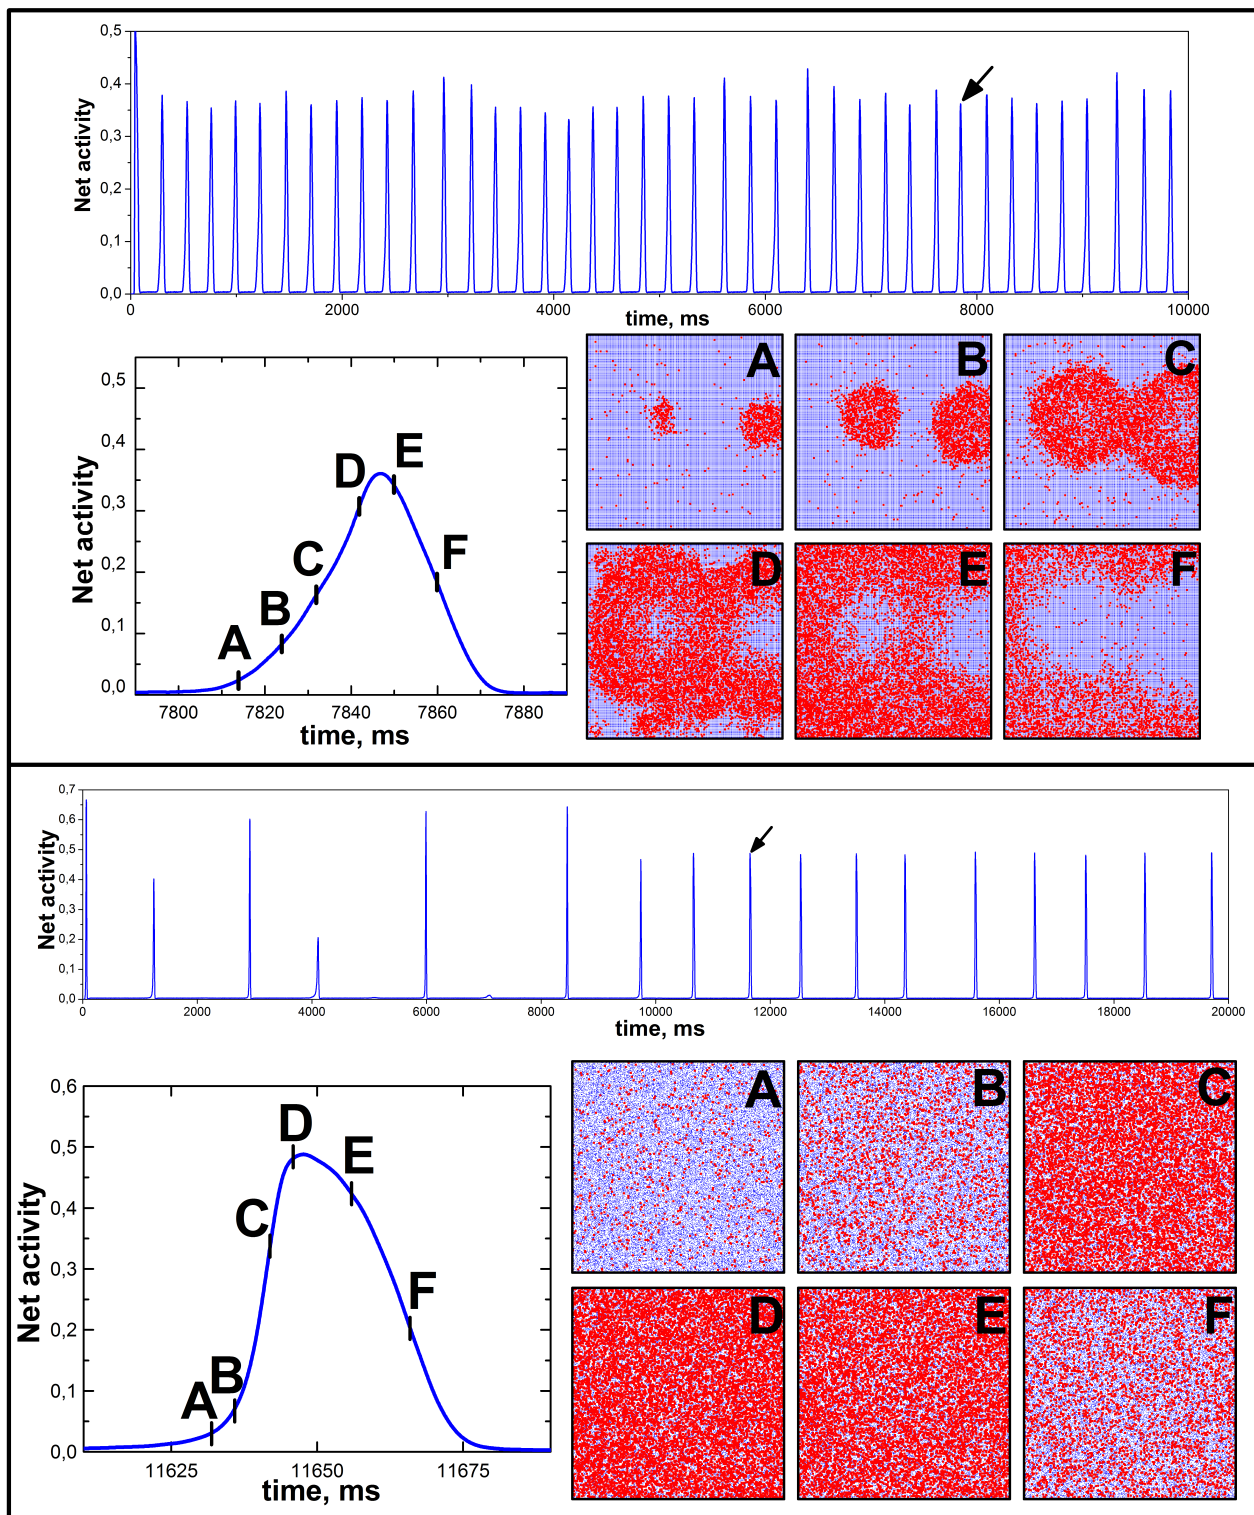

Figure 7. Upper panel: Spatial dynamics of the network spike (marked by the arrow) for the network of 50625 neurons located in  $225 \times 225$  nodes of a square lattice having period  $a = 0.004L$ . Inhibitory neurons (20% of the total) are blocked from the outset of the simulation. The dependence  $p_{con}(r)$ , with  $\lambda = 0.014$ , and other simulation parameters were taken the same as for the network in Fig. 4. On frames **A** and **B** two nucleation centers are clearly visible. Lower panel: A similar simulation for the network of 50 thousand neurons at  $p_{con}(r) = const = 6.4 \cdot 10^{-4}$ , with the same average number of outgoing connections per neuron and other simulation parameters as those for the network in Fig. 4. It is seen that there are no nucleation centers.
